# Supplementary material for: Pertussis toxin suppresses dendritic cell-mediated delivery of B. pertussis into lung-draining lymph nodes
Source: PLoS Pathog. 2022 Jun 6;18(6):e1010577. doi: 10.1371/journal.ppat.1010577 (PMC9216613; doi:10.1371/journal.ppat.1010577)
Supplement: S1 Data — (XLSX) [file ppat.1010577.s001.xlsx]

## Sheet: Figure 1a
Colonization of lungs (CFU)
	Day	Bp wt														Bp AC-												Bp PT-														Bp AC-PT-
	0.08	502000	582000	591000	786000	704000	712000			700000						270000	554000	644000	705000	547000	467000			900000	1120000			838000	866000	842000	556000	709000	511000			947000	607000					608000	545000	628000	533000	545000	560000
	3	22600000	13000000	14500000	15600000	10400000	10000000	16100000	12000000	7900000	10500000	10700000	19700000	13200000	7300000	1370000	2810000	4080000	939000	1710000	2460000	2880000	2620000	1770000	5920000	2300000	1460000	11100000	12000000	13300000	6970000	7560000	14500000	11900000	6200000	7550000	11700000	3100000	8900000	7880000	13000000	248000	94800	45200	105000	88500	66200	74300	19300
	5	15200000	19900000	6720000						23100000	49600000	24600000	26700000	36200000	38700000	2800000	2430000	2770000						1790000	2670000	1630000	2110000	1660000	6060000	1830000						4420000	3500000	4120000	5480000	4070000	2740000	20900	8950	18800
	7	3630000	3120000	21900000	3580000	6010000	4300000	1770000	8290000	4740000	4950000	5100000	3400000	5600000	5450000	1260000	1400000	760000	1230000	1250000	972000	1430000	2040000	760000	1510000	647000	2140000	911000	1080000	1010000	1960000	2250000	1730000	1360000	662000	1920000	780000	1730000	420000	1230000	1600000	12700	9210	5270	2210	6460	14700	3970	77000
	14	84000	28000	91500	31300	24600	131000	11400	2800	139000	3450	8330	250000	95300	1100	53000	38000	399000	74300	5300	46400	60900	17600	165000	58400	206000	12900	200	200	867	996	3400	2390	1740	3320	2870	333	2810	900	1240	695	4590	570	40	393	300	0	2000	20

## Sheet: Figure 1c
Colonization of mLNs (CFU)
	Day	Bp wt														Bp AC-												Bp PT-														Bp AC-PT-
	0.08	1	1	1	1	1	1	1	1	1	1	1	1	1	1	1	1	1	1	1	1	1	1	1	1	1	1	1	1	1	1	1	1	1	1	1	1	1	1	1	1	1	1	1	1	1	1	1	1
	3	133	1	135	316	300	1076	213	409	110	120	303	10	65	10	29	36	14	9	12	8	148	128	11	885	115	280	431	1982	734		237.5	1682.5	297.5	235	672	2169	74	303	145	415	12	18	1	21	2	4	48	7
	5	470	685	835						990	405	1603	1455	6750	6200	195		95						10	5	45	0	1607.5	2572.5	3582.5						3158	978	1205	3880	4000	585	5	5	10
	7	285	157.5	5100	1602.5	627.5	915	4675	942.5	5925	413	50	130	11500	30	105	1685	225	55	126.7	35	322.5	502.5	173	360	0	70	707.5	302.5	482.5	1127.5	3125	1545	1447.5	3005	2727	543	658	823	800	1048	8	1	2	1	5	6	1	10
	14	85	1	175	1150	67	30	1	1	70	0	55	0	58	0	12	6	145	25	1	4	9	1	390	156	129	1	5900	1722.5	2325		1130	1170	1585	2140	8300	1128	10400	5183	7175	4575	1	1	30	1	1	1	1	1

## Sheet: Figure 1d
	Colonization of organs by Bp PT- on day 14
	Lungs	mLNs	Cervical LNs	Inguinal LNs	Spleen	Thymus
	900	5183	1	0	0	1
	1240	7175	0	0	0	0
	695	4575	0	0	0	0
	3780	8300	0	0	0	0
	970	1128	0	0	0	0
	690	10400	0	0	0	0
	380	5900	0	0		0
	2870	1722.5	0	0		0
	333	2325	0	0		0
	2810	1130
	200	1170
	200	1585
	867	2140
	3400
	2390
	1740
	3320

## Sheet: Figure 3b
		Colonization of tracheas (CFUs)
				Day	Bp wt						Bp AC-					Bp PT-
				5	331000	782000	800000	528000	376000		32100	38700	7780	14300	30000	116000	141000	86300	97500	40700
				14	5230	5700	86.7	5860			7850	9000	48000	2500			185		430	615

## Sheet: Figure 4b
		Localization of bacteria on mLN sections
				Day		Surrounding tissue								Capsule								T-cell zone								B-cell zone
				5	Bp wt	13	14	0	0	10	6			1	0	0	0	1	0			1	0	0	0	0	0			6	0	0	0	0	0
					Bp AC-	10	27	13	5	0	3			0	2	0	0	1	0			0	0	0	0	0	0			0	0	0	0	0	0
					Bp PT-	0	0	0	0	43	22			0	0	0	8	1	0			27	12	2	15	1	0			0	0	2	0	0	0
				14	Bp wt	0	0	0	0	0	0			0	0	0	0	0	0			0	1	0	0	0	0			1	0	0	0	0	0
					Bp AC-	0	0	0	0	0	0			0	0	0	0	0	0			0	0	0	0	0	0			0	0	0	0	0	0
					Bp PT-	0	0	0	0	0	0	0		0	0	0	0	0	0	0		0	0	0	0	0	7	1		152	349	0	114	18	52	46
																								b

## Sheet: Figure 5b
	Quantification of bacterial clustering in the mLNs
	Day	1	3	5	7	14
	Number of bacteria / focus	1	1	1	4	4
		1	1	1	1	4
		1	1	1	1	4
		1	1	2	2	4
		1	1	1	2	2
		1	1	1	1	1
		1	1	4	2	1
		1	1	1	2	4
		1	1	3	1	4
		1	1	1	2	4
		1	1	4	4	1
		1	3	1	1	1
		1	1	4	1	4
		1	1	1	1	4
		1	1	3	1	4
		1	1	1	1	1
		1	1	1	4	4
		1	1	1	1	1
		1	1	1	1	1
		1	1	1	1	4
			1	2	1	1
			1	1	2	3
			1	2	1	4
			1	1	3	1
			2	1	4	4
			2	4	3	4
			2	1	1	4
			3	3	1	4
			4	1	1	1
			4	2	1	1

## Sheet: Figure 5d
		Numbers of unicolor and mixed clusters in mLNs of mice challenged with a 1:1 mixture of Bp PT– strains producing mScarlet and GFP fluorescent proteins
		Day	mScarlet only	GFP only	Mixed
		5	6	7	27
		14	27	13	0

## Sheet: Figure 6
	Absolute cell counts in mLNs
	Live cells		Day	Bp wt										Bp AC-										Bp PT-										Bp AC-PT-										PBS
			5	1655884	2368001	1891724	2192272		1926921	2297143		1862937		341574		684353			734286		592255	737297		2634181		2479682	2245253		2769744	1665683	2583590			415372		825760	301002		745890	1066849				316453	557505	269549	417349		460440
			14		4038709	10832069	6510419		6277421	11497699	5516773		11022138	1645768	1112257	3433105	4010168		2447398	1172081	874100	2066471			11615771	9924978	5416927		7961807	3919506	4045885	6537669		1229143	719934	1977418	1704370		1954283	1135759				603672	269800	331535	621696		173557
	B-cells		Day	Bp wt										Bp AC-										Bp PT-										Bp AC-PT-										PBS
			5	706313	1043472	802432	1207489		1396584	1290977		1115777		144308		436154	447823		448229	600519	380945	510263		1365133	1364712	1298316	1163162		1717021	1035738	1355279	1865243		228397	464169	436798	152625		456712	757945				153727	278399	144678	187161		220927
			14		2519358	6459756	3278537		3800266	6759854	3569026		6658829	1036981	684269	1892736	2743136		1474164	810643	507774	1336765		3668055		4794954	2502224		4799832	2578805	2349573	1900471		715974	491663	821533	1068312		1157662	637138				331168	143558	143263	327765		74102
	T-cells		Day	Bp wt										Bp AC-										Bp PT-										Bp AC-PT-										PBS
			5	795508	1011002	525285	620621		406911	795966		538040		177946		194791	236661		222207	191969	156060	193208		1041576	1466507	947668	887131		611679	423325	762932	830851		167706	331881	325585	133609		213379	217851				135237	235874	106067	183607		191993
			14		1129726	2734517	2294001		2007738	2968349	1504425		3268501	498982	342644	1050290	948482		673275	286251	259421	547816		2186825	2877626	2272854	1360599		1999073	1004396	1317970	1231958		294747	189343	909334	505376		620029	392757				228276	107859	163600	242627		86366
	Neutrophils		Day	Bp wt										Bp AC-										Bp PT-										Bp AC-PT-										PBS
			5	7842	12506	6865	9537		7052	5800		17149		280		3517	1584		929	2477	974	324		4715	5549	4308	4165		6685	5481	6814	9446		161	295	844	186		250	319				299	783	518	734		343
			14		5228	43347	34277		13599	59669	22212		45163	2387	1854	7465	3345		4869	5689	1398	6448		6127	2507	4440	2872		3924	1286	2702	2395		1061	620	4384	841		1477	1141				1299	316	987	1074		42
	Eosinophils		Day	Bp wt										Bp AC-										Bp PT-										Bp AC-PT-										PBS
			5	2470	6841	4260	3418		1576	4537		12760		58		763	576		331	348	311	104		1566	1204	1775	417		936	313	3571	1554		32	292	349	53		182	252				49	165	190	397		366
			14		1258	3815	9617		1941	4847	6145		6468	360	263	1642	956		1517	663	699	726		4195	821	816	2206		2104	788	341	2220		464	158	1974	724		1679	281				397	156	263	328		26
	moDC		Day	Bp wt										Bp AC-										Bp PT-										Bp AC-PT-										PBS
			5	9503	9256	8211	13788		8925	5451		24560		47		440	172		356	324	235	186		2417	3061	7080	2583		6888	4810	4310	10326		69	206	168	78		169	267				23	82	40	84		41
			14		1096	13747	29389		3749	18139	4720		14657	288	278	1064	880		530	196	91	870		943	735	1077	437		1843	965	376	610		101	53	676	304		214	114				94	27	19	128		16
	pDCs		Day	Bp wt										Bp AC-										Bp PT-										Bp AC-PT-										PBS
			5	10483	6509	10903	11649		9299	14960		14954		1527		5160	5814		4151	4928	2668	2884		9263	8538	22168	15002		8749	4937	8975	7961		2674	8361	4087	3121		6733	4766				2868	6840	3895	6328		5496
			14		38449	68802	41132		30748	39370	30831		38605	17931	15374	36336	33902		13033	6667	5307	9536		74424	122731	77859	60545		54004	36998	31942	31407		12754	7071	24643	13664		7293	10031				11857	3678	6173	10755		4075
	Mono_Mfs		Day	Bp wt										Bp AC-										Bp PT-										Bp AC-PT-										PBS
			5	8007	13293	14892	15053		10286	9166		14634		742		4048	4178		3394	4092	2365	1680		10543	24395	16261	13323		9883	4124	9641	11385		944	6063	3830	1349		2500	5080				1134	2594	1784	2934		2961
			14		14715	46800	32055		13907	51482	17118		45355	6223	5468	20305	13782		6841	3539	2088	7611		46144	29353	34702	14266		28458	15387	9993	18614		4255	2293	12762	7093		11001	4558				2846	1214	1441	3333		563
[truncated: 3 more columns]

## Sheet: Figure 7b
			Absolute dendritic cell (DC) counts in mLNs
		resident cDC1		Day	Bp wt										Bp AC-										Bp PT-										Bp AC-PT-										PBS
				5	2692	3809	3224	3744		2967	3360		2606		687		918	1174		1641	1527	770	858		5877	8394	6089	5370		5303	3953	6087	5706		1326	3187	1860	1371		2088	1609				963	2133	1068	1908
				14		17338	58278	58715		15238	23184	11203		21516	3932	3546	12933	9280		5977	2329	1631	4009		22153	35579	11818	13905		15469	8161	6163	6294		3620	1969	12922	3527		3359	1410				2442	508	980	2075
		resident cDC2		Day	Bp wt										Bp AC-										Bp PT-										Bp AC-PT-										PBS
				5	2215	4579	3592	4425		2848	2360		3566		294		1123	1223		1180	1051	766	345		5536	6165	8535	5261		6042	3982	3734	6593		631	1326	1266	606		1296	1466				429	1858	782	1396
				14		11786	38084	44655		11085	32699	13291		23766	2963	2327	8305	10488		3641	1890	1106	5867		8955	13531	9337	8579		12113	4915	4721	2845		2085	1264	5460	2756		4088	1213				2491	474	800	1772
		migratory cDC1		Day	Bp wt										Bp AC-										Bp PT-										Bp AC-PT-										PBS
				5	1706	2099	1540	1723		1962	1709		2177		415		323	621		794	834	357	635		8878	6351	6152	8356		11705	5608	12969	12595		388	2649	584	302		1481	1932				335	838	124	256
				14		6216	31605	35705		17480	34513	11891		28530	1658	2302	3714	4150		3538	1271	1084	3108		19702	16514	12177	15617		17266	10541	12256	9131		1413	1033	7710	3605		3573	1657				884	181	351	737
		migratory cDC2		Day	Bp wt										Bp AC-										Bp PT-										Bp AC-PT-										PBS
				5	1668	1791	1714	2028		1629	1783		2303		286		525	856		833	1146	531	1127		8984	4961	6741	6774		15908	6831	13956	14348		347	1566	538	366		1487	1612				214	814	209	352
				14		8390	21410	17138		28462	45634	18168		50811	2939	2692	5431	7797		5665	1602	2145	4899		8060	8949	6431	8978		8383	5259	5348	3532		1664	1025	5407	3208		3932	1276				1078	219	282	1004
[truncated: 4 more columns]

## Sheet: Figure 8a 
mScarlet+ cells associated with Bp bacteria detected in mLNs
	D5, Bp wt
		Cell population	Count	% of all
		Neutrophils	33	37.0787
		B-cells	40	44.9438
		DCs	4	4.49438
		Other	12	13.4831
	D5, Bp PT-
		Cell population	Count	% of all
		Neutrophils	26	16.6667
		B-cells	25	16.0256
		Migratory cDC1	67	42.9487
		Migratory cDC2	8	5.12821
		Other DCs	10	6.41026
		Other	20	12.8205
	D14, Bp PT-
		Cell population	Count	% of all
		Neutrophils	23	20.9091
		B-cells	49	44.5455
		DCs	5	4.54545
		Other	33	30

[truncated: 6 more sheets: Figure 9, Figure S2, Figure S4, Figure S13a, Figure S13b, Figure S17]
